# Supplementary material for: Anion effects on the solvation structure and properties of imide lithium salt-based electrolytes
Source: Royal Society of Chemistry journal article supplement (doi:10.1039/c9ra07824j), 2019-01-01
Supplement: c9ra07824j1.pdf [file c9ra07824j1.pdf]

## Support Information

### Anion Effect on Solvation Structure and Properties of imide lithium salt based electrolytes

Li Wang<sup>†a,b</sup>, Zhen Luo<sup>a</sup>, Hong Xu<sup>a</sup>, Nan Piao<sup>a</sup>, Zonghai Che<sup>c</sup>, Guangyu Tian<sup>b</sup>, Xiangming He<sup>†a,b</sup>

<sup>a</sup>. Institute of Nuclear & New Energy Technology, Tsinghua University, Beijing 100084, China

<sup>b</sup>. State Key Laboratory of Automotive Safety and Energy, Tsinghua University, Beijing, 100084, China

<sup>†</sup> Corresponding author. Email address: [wang-l@tsinghua.edu.cn](mailto:wang-l@tsinghua.edu.cn) (L Wang),  
[hexm@tsinghua.edu.cn](mailto:hexm@tsinghua.edu.cn) (XM He).

**Table S1** Summary of total energies and HOMO/LUMO energy levels of solvent, Li<sup>+</sup>-solvent, and Li<sup>+</sup>-anion-solvent complex, which are calculated using COSMO-DFT method in DMol3 with PBE as functional and DNP 4.4 as basis set.

| Entry | Species                                                                    | Energy (Ha)   | HOMO (eV) | LUMO (eV) |
|-------|----------------------------------------------------------------------------|---------------|-----------|-----------|
| 1     | 1-( <i>cis</i> -DMC)                                                       | -343.3778474  | -6.99088  | -0.46014  |
| 2     | 2-( <i>trans</i> -DMC)                                                     | -343.3749535  | -6.99061  | -0.46096  |
| 3     | 3-Li <sup>+</sup> -( <i>cis4</i> -DMC)                                     | -1380.9855088 | -7.71987  | -1.23703  |
| 4     | 4-Li <sup>+</sup> -( <i>cis3-trans1</i> -DMC)                              | -1380.9841970 | -7.67688  | -1.19757  |
| 5     | 5-Li <sup>+</sup> -( <i>cis2-trans2</i> -DMC)                              | -1380.9823405 | -7.65184  | -1.18424  |
| 6     | 1-Li <sup>+</sup> -( <i>cis2</i> -DMC)-( <i>cis</i> -FSI <sup>-</sup> )    | -2045.5413326 | -7.59851  | -1.40411  |
| 7     | 2-Li <sup>+</sup> -( <i>cis2</i> -DMC)-( <i>trans</i> -FSI <sup>-</sup> )  | -2045.5400047 | -7.64994  | -1.53037  |
| 8     | 3-Li <sup>+</sup> -( <i>cis3</i> -DMC)-( <i>cis</i> -FSI <sup>-</sup> )    | -2388.9243045 | -7.24966  | -1.22805  |
| 9     | 4-Li <sup>+</sup> -( <i>cis3</i> -DMC)-( <i>trans</i> -FSI <sup>-</sup> )  | -2388.9219961 | -7.07496  | -1.17091  |
| 10    | 1-Li <sup>+</sup> -( <i>cis2</i> -DMC)-( <i>cis</i> -TFSI <sup>-</sup> )   | -2520.8544306 | -7.36748  | -1.05961  |
| 11    | 2-Li <sup>+</sup> -( <i>cis2</i> -DMC)-( <i>trans</i> -TFSI <sup>-</sup> ) | -2520.8559330 | -7.53674  | -1.05825  |
| 12    | 3-Li <sup>+</sup> -( <i>cis3</i> -DMC)-( <i>cis</i> -TFSI <sup>-</sup> )   | -2864.2365804 | -7.09428  | -1.00709  |
| 13    | 4-Li <sup>+</sup> -( <i>cis3</i> -DMC)-( <i>trans</i> -TFSI <sup>-</sup> ) | -2864.2373153 | -7.15278  | -1.01526  |

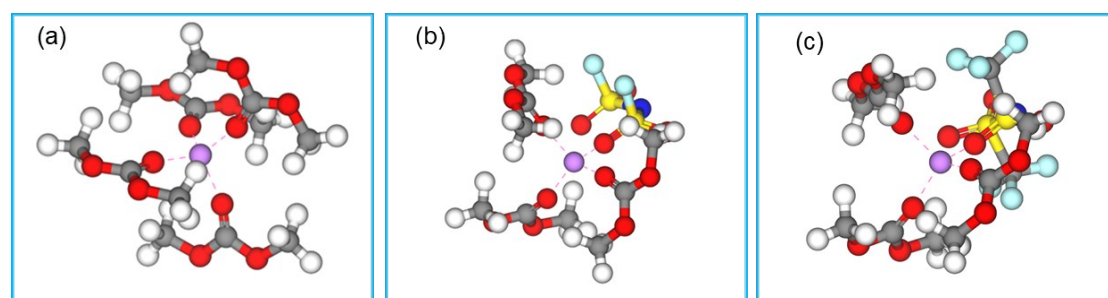

**Figure S1** Optimized structures based on DFT-COSMO simulation. (a) Li<sup>+</sup>-4DMC; (b) Li<sup>+</sup>-2DMC-FSI<sup>-</sup>; (c) Li<sup>+</sup>-2DMC-TFSI<sup>-</sup>. Color code: grey sphere, C; red sphere, O; white sphere, H; magenta sphere, Li. For Li<sup>+</sup>-4DMC, the energy favorable conformation is Li<sup>+</sup>-(*cis4*-DMC). For

$\text{Li}^+$ -2DMC-FSI $^-$ , the energy favorable conformation is  $\text{Li}^+$ -(*cis*2-DMC)-(*cis*-FSI $^-$ ). And for  $\text{Li}^+$ -2DMC-TFSI $^-$ , the energy favorable conformation is  $\text{Li}^+$ -(*cis*2-DMC)-(trans-TFSI $^-$ ).

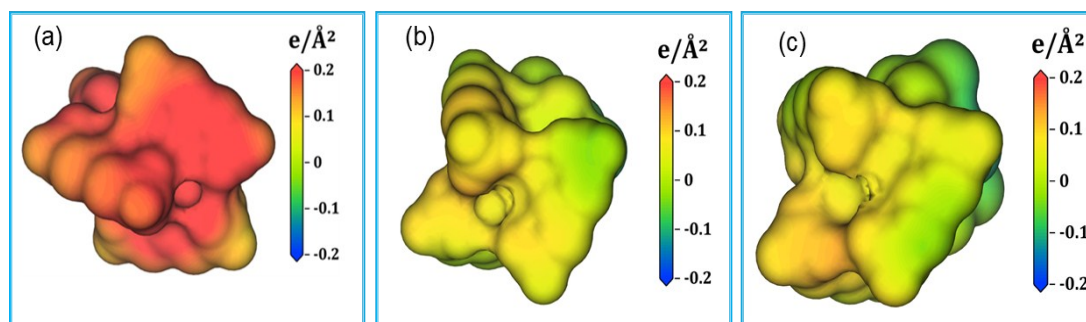

**Figure S2** Surface charge distribution of different clusters. (a)  $\text{Li}^+$ -(*cis*4-DMC); (b)  $\text{Li}^+$ -(*cis*2-DMC)-(*cis*-FSI $^-$ ); (c)  $\text{Li}^+$ -(*cis*2-DMC)-(trans-TFSI $^-$ ). The structures presented are same to the ones in figure S1. It can be observed that  $\text{Li}^+$ -(*cis*4-DMC) are apparently positive in charge, while  $\text{Li}^+$ -(*cis*2-DMC)-(*cis*-FSI $^-$ ) and  $\text{Li}^+$ -(*cis*2-DMC)-(trans-TFSI $^-$ ) are apparently negative in surface charge, and the negative charge is mainly on fluorine atoms.

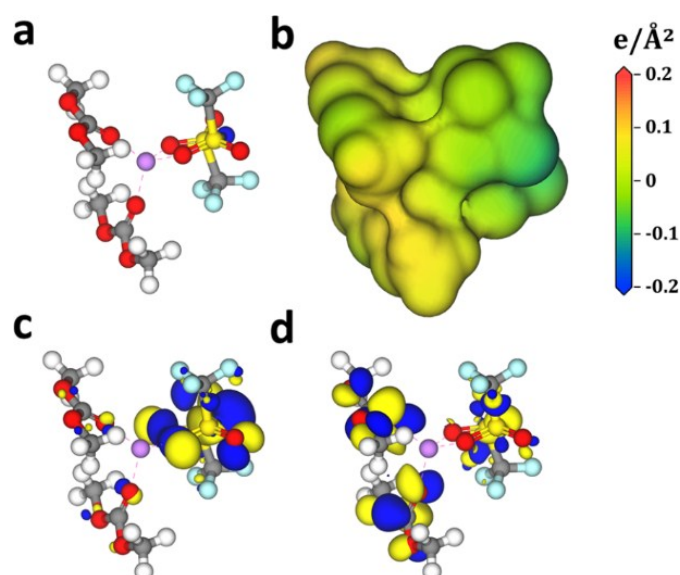

**Figure S3** The structure of  $\text{Li}^+$ -2DMC-TFSI $^-$ . (a)  $\text{Li}^+$ -(*cis*2-DMC)-(trans-TFSI $^-$ ), the energy favorable conformation of  $\text{Li}^+$ -2DMC-TFSI $^-$  according to DFT-COSMO simulation; (b) surface charge distribution under the environment of electrolyte; (c) HOMOs and (d) LUMOs distributions. Color code: grey sphere, C; red sphere, O; blue sphere, N; white sphere, H; yellow sphere, S; cyan sphere, F; magenta sphere, Li. The yellow and blue regions of HOMOs/LUMOs represent the positive and negative parts of orbitals, respectively. As generally HOMOs indicate the active sites to be oxidized and LUMOs indicate the active sites to be reduced, it can be inferred accordingly that TFSI $^-$  will be involved in CEI formation and DMC will be involved in SEI formation.

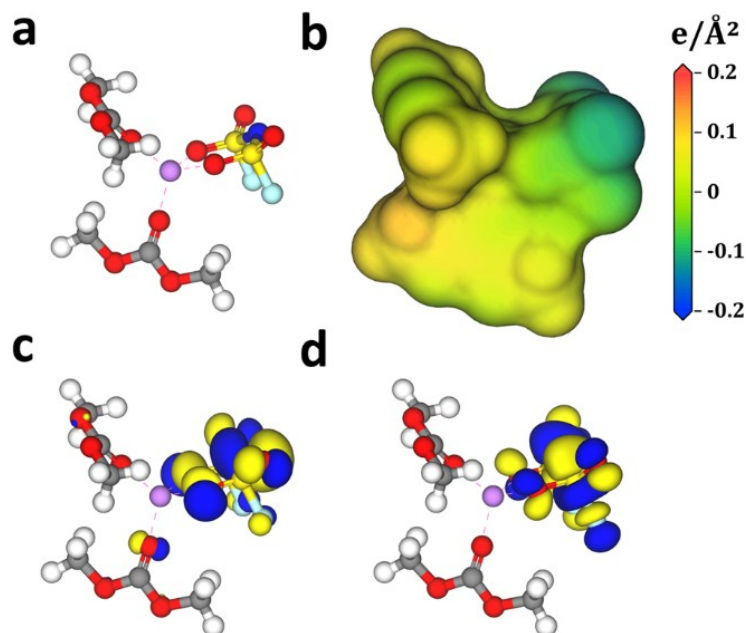

**Figure S4** The structure of  $\text{Li}^+$ -2DMC-FSI<sup>-</sup> (a)  $\text{Li}^+$ -(*cis*2-DMC)-(cis-FSI<sup>-</sup>), the energy favorable conformation of  $\text{Li}^+$ -2DMC-FSI<sup>-</sup> according to DFT-COSMO simulation; (b) surface charge distribution under the environment of electrolyte; (c) HOMOs and (d) LUMOs distributions of  $\text{Li}^+$ -(*cis*2-DMC)-(cis-FSI<sup>-</sup>). Color code: grey sphere, C; red sphere, O; blue sphere, N; white sphere, H; yellow sphere, S; cyan sphere, F; magenta sphere, Li. The yellow and blue regions of HOMOs/LUMOs represent the positive and negative parts of orbitals, respectively. As generally HOMOs indicate the active sites to be oxidized and LUMOs indicate the active sites to be reduced, it can be inferred accordingly that FSI<sup>-</sup> will be involved both in CEI formation and in SEI formation.

**Table S2** Summary of basic physical and chemical parameters of several fluorinated non-solvents to lithium salts. HFRE shows the most applicable melting temperature and vapor pressure under room temperature among all these solvents, which ensure a reasonable temperature window in consideration of mobility and safety.

| Material    | Molecular weight<br>/g·mol <sup>-1</sup> | Melting point<br>/°C | Flashing point<br>/°C | Boiling point<br>/°C | Density<br>/g·cm <sup>-3</sup> | Viscosity<br>/cp | Vapour pressure.<br>25.5°C/kPa |
|-------------|------------------------------------------|----------------------|-----------------------|----------------------|--------------------------------|------------------|--------------------------------|
| HFME        | 182.06                                   | <-40                 | -                     | 51                   | 1.39                           | 0.8              | 36.1                           |
| HFPE        | 196.09                                   | <-40                 | -                     | 63.2                 | 1.33                           | 0.9              | 32.5                           |
| HFE         | 196.09                                   | <-40                 | -                     | 71                   | 1.321                          | 0.9              | 38.3                           |
| <b>HFRE</b> | 232.07                                   | -94.27               | -                     | 93.2                 | 1.533                          | 1.1              | 1                              |
| HFTE        | 332.09                                   | -93                  | -                     | 133                  | 1.626                          | 1.4              | 1.1                            |

|      |        |     |     |         |       |     |    |
|------|--------|-----|-----|---------|-------|-----|----|
| ETFA | 142.08 | -78 | -1  | 60-62   | 1.194 | 1.2 | -  |
| MTFA | 128.05 | -78 | -7  | 43-43.5 | 1.273 | 0.8 | -  |
| PFPA | 192.08 | -   | 1.7 | 75.5    | 1.353 | 0.9 | 15 |

HFME: 1,1,1,3,3,3-Hexafluoroisopropyl Methyl Ether, CAS No. 13171-18-1  
HFPE: 2-ethoxy-1,1,1,3,3,3-hexafluoropropane, CAS No. 690-39-1  
HFE: 1,1,1,2,3,3-hexafluoropropyl ethyl ether, CAS No. 380-34-7  
HFRE: 1,1,2,2-tetrafluoroethyl-2,2,3,3-tetrafluoropropylether, CAS No. 16627-68-2  
HFTE: 1H,1H,5H-octafluoropentyl 1,1,2,2-tetrafluoroethyl Ether, CAS No. 16627-71-7  
ETFA: ethyl trifluoroacetate, CAS No. 383-63-1  
MTFA: methyl trifluoroacetate, CAS No. 431-47-0  
PFPA: ethyl pentafluoropropionate, CAS No. 426-65-3

**Table S3** Comparison of the measured residue mass and theoretical residue mass of LiFSI and LiTFSI based electrolytes with different compositions.  $T_d$  refers to the temperature where lithium salt decomposition starts.

| Residue mass                                                           | LiFSI:DMC:HFRE |         |           | LiTFSI:DMC:HFRE |         |            |
|------------------------------------------------------------------------|----------------|---------|-----------|-----------------|---------|------------|
|                                                                        | 1:12:0         | 1:1.5:0 | 1:1.5:1.5 | 1:12:0          | 1:1.5:0 | 1:1.5:1.5  |
| At 100 °C, measured                                                    | 40%            | 100%    | 55%       | 44%             | 100%    | 68%        |
| Theoretical data<br>(the residue is $\text{Li}^+:\text{DMC}\geq 1:4$ ) | 43%            | 100%    | 48%       | 47%             | 100%    | 55%        |
| Calculated ratio                                                       | 1:3.55:0       | 1:1.5:0 | 1:1.5:0.2 | 1:3.49:0        | 1:1.5   | 1:1.5:0.44 |
| Right before $T_d$ , measured                                          | 26%            | 52%     | 30%       | 32%             | 78%     | 55%        |
| Theoretical data<br>(the residue is Lithium salt)                      | 15%            | 58%     | 28%       | 15%             | 68%     | 37%        |
| Calculated ratio                                                       | 1:1.58         | --      | 1:0.16:0  | 1:1.67          | 1:0.47  | 1:1.52     |
| $> T_d$ , measured                                                     | 18%            | 28%     | 20%       | 18%             | 30%     | 10%        |
| Theoretical data<br>(when the residue is LiF)                          | 2%             | 8%      | 4%        | 2%              | 6%      | 3%         |
| Theoretical data<br>(when the residue is $\text{Li}_2\text{SO}_3$ )    | 7.2%           | 29%     | 14%       | 7%              | 22%     | 11%        |

According to the DSC curves of pure DMC and HFRE, free DMC and HFRE almost totally vaporize below 100 °C. The theoretical residue mass at 100 °C is calculated setting that all the DMC are free except the DMC in solvation sheath ( $\text{Li}^+:\text{DMC}=1:4$ ) in LiFSI:DMC=1:4 electrolyte and HFRE is ideally free without any interactions with DMC in solvation sheath. The theoretical mass residue right before  $T_d$  is calculated on the basis that neat lithium salt is the only residue. The theoretical mass residue at the end of the decomposition is calculated based on two cases. One is that LiF is the only residue after the decomposition of LiFSI or LiTFSI, the other is that  $\text{Li}_2\text{SO}_3$  is the only residue after the decomposition of LiFSI or LiTFSI.

**Table S4** Average coulombic efficiency and capacity retention of NCM622||Li cells with different electrolytes at 25 °C after 100 cycles at 0.5C-rate. The cell with 1M LiPF<sub>6</sub> in EC:DMC=1:1

shows the lowest capacity retention.

|                           | Average coulombic efficiency /% | Capacity retention at the 100th cycle % |
|---------------------------|---------------------------------|-----------------------------------------|
| 1:1.5:1.5 LiTFSI/DMC/HFRE | 99.50                           | 84.03                                   |
| 1:1.5:1.5 LiFSI/DMC/HFRE  | 99.22                           | 89.67                                   |
| 1:1.5 LiTFSI/DMC          | 98.08                           | 80.98                                   |
| 1:1.5 LiFSI/DMC           | 98.97                           | 88.25                                   |
| 1M LiPF6 in EC:DMC=1:1    | 98.63                           | 63.65                                   |
